# Supplementary material for: Preharvest Methyl Jasmonate Treatment Increased Glucosinolate Biosynthesis, Sulforaphane Accumulation, and Antioxidant Activity of Broccoli
Source: MDPI journal article supplement (doi:10.3390/antiox11071298), 2022-06-29
Supplement: s1 [file s1]

Table S1 List of primers used for RT-qPCR in broccoli

| Function                 | Gene Name | Protein name                                           | Sequence (5' to 3') | Gene ID *    |
|--------------------------|-----------|--------------------------------------------------------|---------------------|--------------|
| Housekeeping gene        | Actin-2   |                                                        | F GGAGCTGAGAGATTCC  | LOC106315376 |
|                          |           |                                                        | R GAACCACCACTGAGGA  |              |
| Transcription factor     | MYC2      | Transcription factor MYC2                              | F GCAAGGAGGAGTGTTT  | LOC106295384 |
|                          |           |                                                        | R ATCGTTCTCGCCTTGAT |              |
|                          | MYB28     | Transcription factor MYB28                             | F CCACCACGCAGCCAGA  | LOC106301630 |
|                          |           |                                                        | R TCAGGGAAGCCATTGG  |              |
|                          | MYB34     | Transcription factor MYB34                             | F CTTCATGCTCTTATGGG | LOC106322588 |
|                          |           |                                                        | R CTTCTTGAGATTTGTGT |              |
| Side-chain elongation    | BCAT4     | Branched-chain amino acid aminotransferase 4           | F ATGTTTTGTTTTTGGAT | LOC106292635 |
|                          |           |                                                        | R CGATGACACTTTTACGT |              |
|                          | MAM1      | Methylthioalkylmalate synthase 1                       | F CTTCACTGACTCCCAA  | LOC106324637 |
|                          |           |                                                        | R AAACCATCAAAACCAT  |              |
|                          | MAM3      | Methylthioalkylmalate synthase 3                       | F TAGGTGAGAGAAGTGG  | LOC106321871 |
|                          |           |                                                        | R CTATGGGTTTATGTGGT |              |
| Core structure synthesis | CYP79F1   | Cytochrome P450 79F1                                   | F AACCTCCTTGCTTACCT | LOC106343089 |
|                          |           |                                                        | R TTGTCCTAACCTTCCCT |              |
|                          | CYP79F2   | Cytochrome P450 79F2                                   | F CTGGTCGAAAGTGAAT  | LOC103872429 |
|                          |           |                                                        | R TTTGGATAAAGGTTGG  |              |
|                          | CYP79B3   | Tryptophan N- monooxygenase 2                          | F CCCTTTGCTTACCGCTG | LOC103864341 |
|                          |           |                                                        | R CTTTCTTTGCCGACGAC |              |
|                          | CYP83A1   | Cytochrome p450, family 83, subfamily a, polypeptide 1 | F TTCCCGTTATTCGGATT | LOC106342466 |
|                          |           |                                                        | R CTCTCAGTTTCTGGCTT |              |
|                          | CYP83B1   | CYP83B1 monooxygenase                                  | F ACACTTCCTCTTTCGTC | LOC103833295 |
|                          |           |                                                        | R CGGTTCCGTACTCGTTA |              |
| GSL degradation          | SUR1      | S-alkyl-thiohydroximate lyase SUR1                     | F GACATAACACCTGACC  | LOC106306752 |
|                          |           |                                                        | R CCTTGAGCCTATCACAC |              |
|                          | UGT74B1   | UDP- glycosyltransferase 74B1                          | F CGAATCAAAGACGATA  | LOC103840711 |
|                          |           |                                                        | R ACCAAACGAAACAAAA  |              |
|                          | UGT74C1   | UDP- glycosyltransferase 74C1                          | F ATGATCTGCCTTCTTTC | LOC106342937 |
|                          |           |                                                        | R ACTTTGCTGGTTTATTC |              |
|                          | SOT17     | Cytosolic sulfotransferase 17                          | F AAGGCTGGAGACCGAA  | LOC106343839 |
|                          |           |                                                        | R TTCAGGAGAGGGTTGG  |              |
|                          | SOT18     | Cytosolic sulfotransferase 18                          | F CGAAGGAGGAAGAGG   | LOC106336556 |
|                          |           |                                                        | R TGGCATAAACAGCAGG  |              |
|                          | MY        | Myrosinase 1                                           | F ACCAAATACGGCGACC  | LOC106326800 |
|                          |           |                                                        | R TCCAAGAGCCCATGCA  |              |

Note: \* identified from the Brassica oleracea var. oleracea cultivar TO1000 genome data base.

The genes were reported in reference "A Comprehensive Gene Inventory for Glucosinolate Biosynthetic Pathway in *Arabidopsis thaliana*".

Table S2 Desulphated GSLs identified in broccoli florets, stem, and leaves using UPLC–MS.

| No. | Retention<br>time<br>(min) | Trivial name            | Abbreviations | Semisystematic name           | Molecular<br>weight <sup>a</sup> |
|-----|----------------------------|-------------------------|---------------|-------------------------------|----------------------------------|
| 1   | 8.3                        | Glucoiberin             | IBE           | 3-Methylthioallylthio GLS     | 343                              |
| 2   | 10.6                       | Sinigrin                | SIN           | 2-Propenyl                    | 279                              |
| 3   | 11.2                       | Glucoraphanin           | GRA           | 4-Methylsulfinylbutyl GLS     | 357                              |
| 4   | 18.5                       | 4-hydroxyglucobrassicin | 4OH           | 4-Hydroxyindol-3-ylmethyl GLS | 384                              |
| 5   | 24.72                      | Glucoerucin             | ERU           | 4-Methylsulthiobutyl GLS      | 351                              |
| 6   | 27.09                      | Glucobrassicin          | GBC           | Indole-3-methylthio GLS       | 368                              |
| 7   | 30.16                      | 4-Methoxyglucobrassicin | 4ME           | 4-Methoxyindol-3-ylmethyl GLS | 398                              |
| 8   | 33.62                      | Neoglucobrassicin       | NGBC          | 1-Methoxyindol-3-ylmethyl GLS | 398                              |

<sup>a</sup> As desulfo- glucosinolate

Table S3 Effects of MeJA on GSLs content in broccoli florets, stem and leaves.

| Cultivars    | Organ/<br>Tissue | Control                                           |                                                       |                                                    | MeJA                                              |                                                       |                                                    |
|--------------|------------------|---------------------------------------------------|-------------------------------------------------------|----------------------------------------------------|---------------------------------------------------|-------------------------------------------------------|----------------------------------------------------|
|              |                  | Total GSLs<br>content<br>( $\mu\text{mol/g DW}$ ) | Aliphatic GSLs<br>content<br>( $\mu\text{mol/g DW}$ ) | Indole GSLs<br>content<br>( $\mu\text{mol/g DW}$ ) | Total GSLs<br>content<br>( $\mu\text{mol/g DW}$ ) | Aliphatic GSLs<br>content<br>( $\mu\text{mol/g DW}$ ) | Indole GSLs<br>content<br>( $\mu\text{mol/g DW}$ ) |
| Yanxiu       | Florets          | 11.76 $\pm$ 0.84                                  | 1.92 $\pm$ 0.18                                       | 9.84 $\pm$ 0.93                                    | 17.43 $\pm$ 1.55                                  | 2.38 $\pm$ 0.13                                       | 15.04 $\pm$ 1.53                                   |
|              | Stem             | 2.70 $\pm$ 0.59                                   | 0.78 $\pm$ 0.17                                       | 1.92 $\pm$ 0.34                                    | 5.17 $\pm$ 0.57                                   | 1.31 $\pm$ 0.16                                       | 3.73 $\pm$ 0.31                                    |
|              | Leaves           | 4.44 $\pm$ 0.43                                   | 0.38 $\pm$ 0.062                                      | 4.07 $\pm$ 0.47                                    | 6.87 $\pm$ 0.86                                   | 0.45 $\pm$ 0.12                                       | 6.42 $\pm$ 0.88                                    |
| Xianglv NO.3 | Florets          | 19.84 $\pm$ 1.29                                  | 2.93 $\pm$ 0.13                                       | 16.91 $\pm$ 1.18                                   | 27.66 $\pm$ 1.66                                  | 4.44 $\pm$ 0.61                                       | 23.22 $\pm$ 2.22                                   |
|              | Stem             | 3.17 $\pm$ 0.53                                   | 1.33 $\pm$ 0.20                                       | 1.84 $\pm$ 0.33                                    | 6.51 $\pm$ 0.59                                   | 1.64 $\pm$ 0.56                                       | 4.87 $\pm$ 0.55                                    |
|              | Leaves           | 7.96 $\pm$ 0.56                                   | 0.66 $\pm$ 0.073                                      | 7.30 $\pm$ 0.44                                    | 7.95 $\pm$ 0.58                                   | 0.74 $\pm$ 0.16                                       | 7.21 $\pm$ 0.71                                    |

Table S4 Effects of MeJA on glucoraphanin content, sulforaphane content and myrosinase activity in broccoli florets, stem and leaves.

| Cultivars    | Organ/<br>Tissue | Control                                              |                                                   |                                              | MeJA                                                 |                                                   |                                              |
|--------------|------------------|------------------------------------------------------|---------------------------------------------------|----------------------------------------------|------------------------------------------------------|---------------------------------------------------|----------------------------------------------|
|              |                  | Glucoraphanin<br>content<br>( $\mu\text{mol/g DW}$ ) | Sulforaphane<br>content<br>( $\mu\text{g/g DW}$ ) | Myrosinase<br>activity<br>(U/min/mg protein) | Glucoraphanin<br>content<br>( $\mu\text{mol/g DW}$ ) | Sulforaphane<br>content<br>( $\mu\text{g/g DW}$ ) | Myrosinase<br>activity<br>(U/min/mg protein) |
| Yanxiu       | Florets          | 0.86 $\pm$ 0.12                                      | 33.05 $\pm$ 5.48                                  | 1.87 $\pm$ 0.60                              | 1.44 $\pm$ 0.14                                      | 53.36 $\pm$ 3.05                                  | 3.15 $\pm$ 0.17                              |
|              | Stem             | 0.25 $\pm$ 0.05                                      | 5.21 $\pm$ 0.83                                   | 0.68 $\pm$ 0.14                              | 0.87 $\pm$ 0.12                                      | 5.78 $\pm$ 0.76                                   | 0.74 $\pm$ 0.19                              |
|              | Leaves           | 0.31 $\pm$ 0.096                                     | 3.53 $\pm$ 0.61                                   | 1.81 $\pm$ 0.30                              | 0.18 $\pm$ 0.034                                     | 3.70 $\pm$ 0.95                                   | 2.19 $\pm$ 0.29                              |
| Xianglv NO.3 | Florets          | 2.70 $\pm$ 0.16                                      | 49.97 $\pm$ 6.15                                  | 1.59 $\pm$ 0.20                              | 4.15 $\pm$ 0.64                                      | 80.28 $\pm$ 6.70                                  | 3.61 $\pm$ 0.25                              |
|              | Stem             | 1.07 $\pm$ 0.10                                      | 5.31 $\pm$ 0.77                                   | 0.54 $\pm$ 0.14                              | 1.89 $\pm$ 0.20                                      | 6.45 $\pm$ 0.97                                   | 0.64 $\pm$ 0.019                             |
|              | Leaves           | 0.66 $\pm$ 0.073                                     | 4.71 $\pm$ 1.11                                   | 1.47 $\pm$ 0.26                              | 0.74 $\pm$ 0.16                                      | 4.42 $\pm$ 0.90                                   | 1.88 $\pm$ 0.25                              |

Table S5 Correlation analysis of sulforaphane content between glucoraphanin contents and myrosinase activity in broccoli florets

|                           |                        | Sulforaphane<br>content | glucoraphanin<br>contents | myrosinase<br>activity |
|---------------------------|------------------------|-------------------------|---------------------------|------------------------|
| Sulforaphane<br>content   | Pearson correlation    | 1.000                   | 0.896**                   | 0.754**                |
|                           | Significant (2-tailed) |                         | 0.000                     | 0.005                  |
|                           | Sample number          | 12                      | 12                        | 12                     |
| Glucoraphanin<br>contents | Pearson correlation    | 0.896**                 | 1.000                     | 0.444                  |
|                           | Significant (2-tailed) | 0.000                   |                           | 0.148                  |
|                           | Sample number          | 12                      | 12                        | 12                     |
| Myrosinase<br>activity    | Pearson correlation    | 0.754**                 | 0.444                     | 1.000                  |
|                           | Significant (2-tailed) | 0.005                   | 0.148                     |                        |
|                           | Sample number          | 12                      | 12                        | 12                     |

\*\*, Correlation is significant at the 0.01 level (2-tailed)

Table S6 Effects of MeJA on glucoraphanin content, sulforaphane content and myrosinase activity in broccoli florets, stem and leaves.

| Cultivars    | Organ/<br>Tissue | Control                                 |                                          | MeJA                                    |                                          |
|--------------|------------------|-----------------------------------------|------------------------------------------|-----------------------------------------|------------------------------------------|
|              |                  | Total phenolics<br>content<br>(mg/g DW) | Total flavonoids<br>Content<br>(mg/g DW) | Total phenolics<br>content<br>(mg/g DW) | Total flavonoids<br>Content<br>(mg/g DW) |
| Yanxiu       | Florets          | 11.32±0.44                              | 9.73±0.97                                | 10.56±0.32                              | 12.10±0.89                               |
|              | Stem             | 8.66±0.41                               | 0.77±0.067                               | 7.80±0.71                               | 0.52±0.18                                |
|              | Leaves           | 7.11±0.68                               | 3.09±0.65                                | 7.57±0.60                               | 2.42±0.14                                |
| Xianglv No.3 | Florets          | 9.79±0.60                               | 7.31±1.36                                | 9.11±1.48                               | 10.47±0.53                               |
|              | Stem             | 6.75±0.48                               | 0.73±0.14                                | 6.42±0.68                               | 0.56±0.11                                |
|              | Leaves           | 8.15±0.12                               | 1.77±0.32                                | 7.60±0.89                               | 1.33±0.31                                |

Table S7 Effects of MeJA on glucoraphanin content, sulforaphane content and myrosinase activity in broccoli florets, stem and leaves.

| Cultivars    | Organ/<br>Tissue | Control     |             |                      | MeJA        |             |                      |
|--------------|------------------|-------------|-------------|----------------------|-------------|-------------|----------------------|
|              |                  | DPPH<br>(%) | ABTS<br>(%) | FRAP<br>(μmol/mg FW) | DPPH<br>(%) | ABTS<br>(%) | FRAP<br>(μmol/mg FW) |
| Yanxiu       | Florets          | 63.63±6.11  | 64.17±2.49  | 12.10±1.94           | 79.62±5.06  | 78.59±3.83  | 16.46±1.57           |
|              | Stem             | 44.67±1.40  | 41.72±4.50  | 6.40±0.52            | 46.24±4.61  | 41.17±1.71  | 6.20±1.23            |
|              | Leaves           | 44.49±2.86  | 35.93±7.13  | 6.37±1.40            | 48.04±3.77  | 39.77±0.57  | 7.80±0.41            |
| Xianglv No.3 | Florets          | 66.40±2.52  | 63.86±2.69  | 10.67±1.31           | 83.67±2.38  | 84.57±3.59  | 14.92±1.58           |
|              | Stem             | 48.46±3.07  | 40.71±0.56  | 3.14±0.74            | 47.17±5.27  | 39.84±2.50  | 4.03±1.07            |
|              | Leaves           | 52.81±0.82  | 41.17±2.38  | 9.09±0.27            | 49.37±2.49  | 39.21±0.85  | 8.08±0.50            |
